# Supplementary material for: 5-Azacytidine Promotes an Inhibitory T-Cell Phenotype and Impairs Immune Mediated Antileukemic Activity
Source: Hindawi journal article supplement (doi:10.1155/2014/418292), 2014-01-01
Supplement: f1 [file 418292.f1.pdf]

## Supplementary Figure 1

### Figure Legend

Figure S1. CD3<sup>+</sup> T- cells were treated with 5 $\mu$ M, 20 $\mu$ M or without 5-Aza for 48h. Then cells were stimulated with PMA and ionomycin in the presence of brevedinA for 4.5h. Thereafter T- cells were analysed for the expression of CD4 and CD8. The CD8<sup>+</sup> T- cells were further assessed for the production of granzyme. A representative FACS pot of three independent experiments is shown.

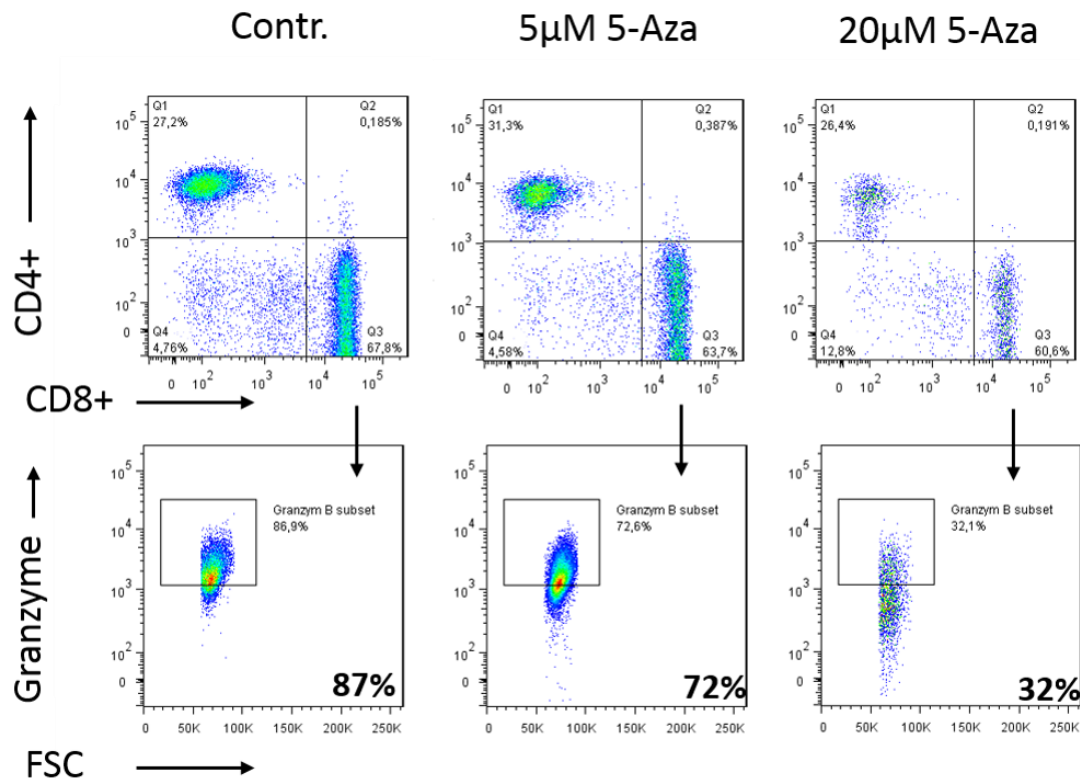

## Supplementary Figure 2.

### Figure Legend

Figure S2. Gating strategy for identification of naïve T- cells. T- cells were cultured for 48h with the indicated dosages of 5-Aza. Untreated T- cells were used as control. Cells were analysed for the expression of CD4 to identify CD4+ T- cells which were further sub gated for the expression of CD45RA and CCR7. Cells expressing both (CD45RA+/CCR7+) were considered to be naïve T- cells. The same strategy was used to identify naïve CD8+ T- cells.

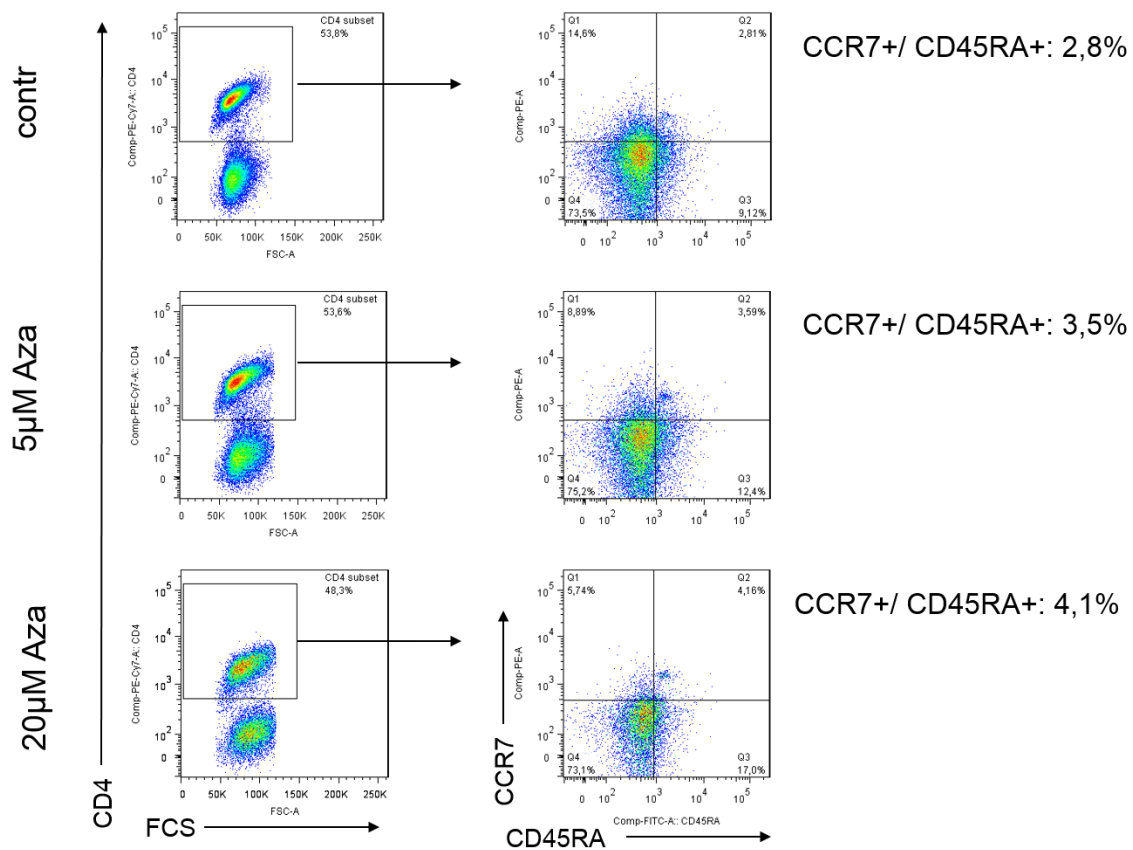

**Supplementary Table 1**

| Patient | Age | Sex | Disease | Cytogenetic<br>molecular<br>genetics | Conditioning     | Stem cell<br>source | Outcome | 5-Aza start |
|---------|-----|-----|---------|--------------------------------------|------------------|---------------------|---------|-------------|
| 1       | 63y | M   | sAML    | Tri8,<br>CBL mut                     | TBI / Flu        | PBSC                | death   | + 66 d      |
| 2       | 57y | M   | CMML    | nk,<br>TET2 mut, CBL<br>mut          | FLAMSA/ Bu<br>Cy | PBSC                | alive   | + 96 d      |
| 3       | 61y | M   | MDS/MPN | nk<br>NRAS mut                       | Bu / Flu         | PBSC                | alive   | + 127 d     |

Abbreviations: (M) male, (sAML) secondary acute myeloblastic leukemia, (CMML) chronic myelomonocytic leukemia, (MDS/MPN) myelodysplastic syndrome, myeloproliferative neoplasme. (Tri8) trisomie of chromosome 8, (nk) normal karyotype, (NRAS mut) NRAS mutation codon 61, (CBL mut) CAS-BR-M murine ecotropic retroviral transforming sequence homolog mutation, (TET2 mut) TET oncogene family member 2 mutation, (FLAMSA) Fludarabine, mAmsacrine, Cytarabine, (Bu) Busulphan, (Cy) Cyclophosphamide, (TBI) total body irradiation, (Flu) Fludarabine, (PBSC) peripheral blood stem cells.
